# Supplementary material for: The iron–sulfur helicase DDX11 promotes the generation of single-stranded DNA for CHK1 activation
Source: Life Sci Alliance. 2020 Feb 18;3(3):e201900547. doi: 10.26508/lsa.201900547 (PMC7032568; doi:10.26508/lsa.201900547)
Supplement: Supplementary file 3 [file LSA-2019-00547_TableS2.xlsx]

## Sheet: GO overrepresentation
Analysis Type:	PANTHER Overrepresentation Test (Released 20190308)
Annotation Version and Release Date:	GO Ontology database Released 2019-02-02
Analyzed List:	MS DDX11 (Homo sapiens)
Reference List:	Homo sapiens (all genes in database)
Test Type:	FISHER
Correction:	FDR (False Discovery Rate)
GO biological process complete	Homo sapiens - REFLIST (20996)	MS DDX11 Input (92)	MS DDX11 Input (expected)	MS DDX11 Input (fold Enrichment)	MS DDX11 Input (raw P-value)	MS DDX11 Input (FDR)
regulation of cellular response to heat (GO:1900034)	79	6	0.35	17.33	1.94e-06	0.00236
DNA replication (GO:0006260)	213	7	0.93	7.5	5.05e-05	0.0307
ubiquitin-dependent protein catabolic process (GO:0006511)	514	10	2.25	4.44	9.58e-05	0.0489
mitotic cell cycle (GO:0000278)	678	13	2.97	4.38	9.26e-06	0.00771
regulation of cell cycle process (GO:0010564)	767	14	3.36	4.17	7.03e-06	0.00654
protein modification by small protein conjugation (GO:0032446)	766	13	3.36	3.87	3.26e-05	0.0235
regulation of catabolic process (GO:0009894)	976	16	4.28	3.74	5.55e-06	0.00585
cell cycle process (GO:0022402)	959	14	4.2	3.33	7.92e-05	0.0418
protein-containing complex assembly (GO:0065003)	1545	22	6.77	3.25	7.36e-07	0.00116
organelle organization (GO:0006996)	3342	30	14.64	2.05	7.84e-05	0.0428

## Sheet: GO 1900034
HUMAN|HGNC=1462|UniProtKB=Q13557	KCC2D_HUMAN	Calcium/calmodulin-dependent protein kinase type II subunit delta;CAMK2D;ortholog	CALCIUM/CALMODULIN-DEPENDENT PROTEIN KINASE TYPE II SUBUNIT DELTA (PTHR24347:SF365)
HUMAN|HGNC=3720|UniProtKB=Q02790	FKBP4_HUMAN	Peptidyl-prolyl cis-trans isomerase FKBP4;FKBP4;ortholog	PEPTIDYL-PROLYL CIS-TRANS ISOMERASE FKBP4 (PTHR10516:SF25)	calcium-binding protein(PC00060);chaperone(PC00072);isomerase(PC00135)
HUMAN|HGNC=12392|UniProtKB=Q99615	DNJC7_HUMAN	DnaJ homolog subfamily C member 7;DNAJC7;ortholog	DNAJ HOMOLOG SUBFAMILY C MEMBER 7 (PTHR44200:SF1)
HUMAN|HGNC=8067|UniProtKB=Q99567	NUP88_HUMAN	Nuclear pore complex protein Nup88;NUP88;ortholog	NUCLEAR PORE COMPLEX PROTEIN NUP88 (PTHR13257:SF0)	transporter(PC00227)
HUMAN|HGNC=29929|UniProtKB=Q8NFH4	NUP37_HUMAN	Nucleoporin Nup37;NUP37;ortholog	NUCLEOPORIN NUP37 (PTHR22806:SF0)	transfer/carrier protein(PC00219)
HUMAN|HGNC=8734|UniProtKB=Q9BW27	NUP85_HUMAN	Nuclear pore complex protein Nup85;NUP85;ortholog	NUCLEAR PORE COMPLEX PROTEIN NUP85 (PTHR13373:SF21)	structural protein(PC00211)

## Sheet: GO 0006260
HUMAN|HGNC=10452|UniProtKB=P31350	RIR2_HUMAN	Ribonucleoside-diphosphate reductase subunit M2;RRM2;ortholog	RIBONUCLEOSIDE-DIPHOSPHATE REDUCTASE SUBUNIT M2 (PTHR23409:SF20)	reductase(PC00198)
HUMAN|HGNC=30073|UniProtKB=Q14181	DPOA2_HUMAN	DNA polymerase alpha subunit B;POLA2;ortholog	DNA POLYMERASE ALPHA SUBUNIT B (PTHR23061:SF12)	DNA-directed DNA polymerase(PC00018)
HUMAN|HGNC=9175|UniProtKB=P28340	DPOD1_HUMAN	DNA polymerase delta catalytic subunit;POLD1;ortholog	DNA POLYMERASE DELTA CATALYTIC SUBUNIT (PTHR10322:SF23)
HUMAN|HGNC=23170|UniProtKB=O75717	WDHD1_HUMAN	WD repeat and HMG-box DNA-binding protein 1;WDHD1;ortholog	WD REPEAT AND HMG-BOX DNA-BINDING PROTEIN 1 (PTHR19932:SF10)	DNA binding protein(PC00009)
HUMAN|HGNC=2736|UniProtKB=Q96FC9	DDX11_HUMAN	ATP-dependent DNA helicase DDX11;DDX11;ortholog	ATP-DEPENDENT DNA HELICASE DDX11-RELATED (PTHR11472:SF41)	DNA helicase(PC00011)
HUMAN|HGNC=10451|UniProtKB=P23921	RIR1_HUMAN	Ribonucleoside-diphosphate reductase large subunit;RRM1;ortholog	RIBONUCLEOSIDE-DIPHOSPHATE REDUCTASE LARGE SUBUNIT (PTHR11573:SF6)	reductase(PC00198)
HUMAN|HGNC=15925|UniProtKB=Q9Y3Z3	SAMH1_HUMAN	Deoxynucleoside triphosphate triphosphohydrolase SAMHD1;SAMHD1;ortholog	DEOXYNUCLEOSIDE TRIPHOSPHATE TRIPHOSPHOHYDROLASE SAMHD1 (PTHR11373:SF4)

## Sheet: GO 0006511
HUMAN|HGNC=2552|UniProtKB=Q13617	CUL2_HUMAN	Cullin-2;CUL2;ortholog	CULLIN-2 (PTHR11932:SF131)	ubiquitin-protein ligase(PC00234)
HUMAN|HGNC=11427|UniProtKB=Q9UNE7	CHIP_HUMAN	E3 ubiquitin-protein ligase CHIP;STUB1;ortholog	E3 UBIQUITIN-PROTEIN LIGASE CHIP (PTHR46803:SF2)
HUMAN|HGNC=20066|UniProtKB=Q70CQ2	UBP34_HUMAN	Ubiquitin carboxyl-terminal hydrolase 34;USP34;ortholog	UBIQUITIN CARBOXYL-TERMINAL HYDROLASE 34 (PTHR24006:SF671)	cysteine protease(PC00081)
HUMAN|HGNC=24666|UniProtKB=Q96CS3	FAF2_HUMAN	FAS-associated factor 2;FAF2;ortholog	FAS-ASSOCIATED FACTOR 2 (PTHR23322:SF72)
HUMAN|HGNC=6763|UniProtKB=Q13257	MD2L1_HUMAN	Mitotic spindle assembly checkpoint protein MAD2A;MAD2L1;ortholog	MITOTIC SPINDLE ASSEMBLY CHECKPOINT PROTEIN MAD2A (PTHR11842:SF13)
HUMAN|HGNC=9563|UniProtKB=Q16401	PSMD5_HUMAN	26S proteasome non-ATPase regulatory subunit 5;PSMD5;ortholog	26S PROTEASOME NON-ATPASE REGULATORY SUBUNIT 5 (PTHR13554:SF10)
HUMAN|HGNC=9531|UniProtKB=P25787	PSA2_HUMAN	Proteasome subunit alpha type-2;PSMA2;ortholog	PROTEASOME SUBUNIT ALPHA TYPE-2 (PTHR11599:SF16)
HUMAN|HGNC=9539|UniProtKB=P49721	PSB2_HUMAN	Proteasome subunit beta type-2;PSMB2;ortholog	PROTEASOME SUBUNIT BETA TYPE-2 (PTHR11599:SF6)
HUMAN|HGNC=12609|UniProtKB=P51784	UBP11_HUMAN	Ubiquitin carboxyl-terminal hydrolase 11;USP11;ortholog	UBIQUITIN CARBOXYL-TERMINAL HYDROLASE 11 (PTHR21646:SF29)	cysteine protease(PC00081)
HUMAN|HGNC=30313|UniProtKB=Q5T4S7	UBR4_HUMAN	E3 ubiquitin-protein ligase UBR4;UBR4;ortholog	E3 UBIQUITIN-PROTEIN LIGASE UBR4 (PTHR21725:SF1)

## Sheet: GO 0000278
HUMAN|HGNC=10452|UniProtKB=P31350	RIR2_HUMAN	Ribonucleoside-diphosphate reductase subunit M2;RRM2;ortholog	RIBONUCLEOSIDE-DIPHOSPHATE REDUCTASE SUBUNIT M2 (PTHR23409:SF20)	reductase(PC00198)
HUMAN|HGNC=30073|UniProtKB=Q14181	DPOA2_HUMAN	DNA polymerase alpha subunit B;POLA2;ortholog	DNA POLYMERASE ALPHA SUBUNIT B (PTHR23061:SF12)	DNA-directed DNA polymerase(PC00018)
HUMAN|HGNC=24502|UniProtKB=O43379	WDR62_HUMAN	WD repeat-containing protein 62;WDR62;ortholog	WD REPEAT-CONTAINING PROTEIN 62 (PTHR45589:SF3)
HUMAN|HGNC=2552|UniProtKB=Q13617	CUL2_HUMAN	Cullin-2;CUL2;ortholog	CULLIN-2 (PTHR11932:SF131)	ubiquitin-protein ligase(PC00234)
HUMAN|HGNC=29130|UniProtKB=O94927	HAUS5_HUMAN	HAUS augmin-like complex subunit 5;HAUS5;ortholog	HAUS AUGMIN-LIKE COMPLEX SUBUNIT 5 (PTHR28588:SF1)
HUMAN|HGNC=6763|UniProtKB=Q13257	MD2L1_HUMAN	Mitotic spindle assembly checkpoint protein MAD2A;MAD2L1;ortholog	MITOTIC SPINDLE ASSEMBLY CHECKPOINT PROTEIN MAD2A (PTHR11842:SF13)
HUMAN|HGNC=23170|UniProtKB=O75717	WDHD1_HUMAN	WD repeat and HMG-box DNA-binding protein 1;WDHD1;ortholog	WD REPEAT AND HMG-BOX DNA-BINDING PROTEIN 1 (PTHR19932:SF10)	DNA binding protein(PC00009)
HUMAN|HGNC=9380|UniProtKB=P17612	KAPCA_HUMAN	cAMP-dependent protein kinase catalytic subunit alpha;PRKACA;ortholog	CAMP-DEPENDENT PROTEIN KINASE CATALYTIC SUBUNIT ALPHA (PTHR24353:SF82)
HUMAN|HGNC=12998|UniProtKB=O43670	ZN207_HUMAN	BUB3-interacting and GLEBS motif-containing protein ZNF207;ZNF207;ortholog	BUB3-INTERACTING AND GLEBS MOTIF-CONTAINING PROTEIN ZNF207 (PTHR23215:SF1)	DNA binding protein(PC00009)
HUMAN|HGNC=10451|UniProtKB=P23921	RIR1_HUMAN	Ribonucleoside-diphosphate reductase large subunit;RRM1;ortholog	RIBONUCLEOSIDE-DIPHOSPHATE REDUCTASE LARGE SUBUNIT (PTHR11573:SF6)	reductase(PC00198)
HUMAN|HGNC=8067|UniProtKB=Q99567	NUP88_HUMAN	Nuclear pore complex protein Nup88;NUP88;ortholog	NUCLEAR PORE COMPLEX PROTEIN NUP88 (PTHR13257:SF0)	transporter(PC00227)
HUMAN|HGNC=14082|UniProtKB=Q9NQW6	ANLN_HUMAN	Anillin;ANLN;ortholog	ANILLIN (PTHR21538:SF23)
HUMAN|HGNC=1990|UniProtKB=Q8WWK9	CKAP2_HUMAN	Cytoskeleton-associated protein 2;CKAP2;ortholog	CYTOSKELETON-ASSOCIATED PROTEIN 2 (PTHR16076:SF8)

## Sheet: GO 0010564
HUMAN|HGNC=10452|UniProtKB=P31350	RIR2_HUMAN	Ribonucleoside-diphosphate reductase subunit M2;RRM2;ortholog	RIBONUCLEOSIDE-DIPHOSPHATE REDUCTASE SUBUNIT M2 (PTHR23409:SF20)	reductase(PC00198)
HUMAN|HGNC=29130|UniProtKB=O94927	HAUS5_HUMAN	HAUS augmin-like complex subunit 5;HAUS5;ortholog	HAUS AUGMIN-LIKE COMPLEX SUBUNIT 5 (PTHR28588:SF1)
HUMAN|HGNC=6763|UniProtKB=Q13257	MD2L1_HUMAN	Mitotic spindle assembly checkpoint protein MAD2A;MAD2L1;ortholog	MITOTIC SPINDLE ASSEMBLY CHECKPOINT PROTEIN MAD2A (PTHR11842:SF13)
HUMAN|HGNC=9563|UniProtKB=Q16401	PSMD5_HUMAN	26S proteasome non-ATPase regulatory subunit 5;PSMD5;ortholog	26S PROTEASOME NON-ATPASE REGULATORY SUBUNIT 5 (PTHR13554:SF10)
HUMAN|HGNC=26244|UniProtKB=Q8IW35	CEP97_HUMAN	Centrosomal protein of 97 kDa;CEP97;ortholog	CENTROSOMAL PROTEIN OF 97 KDA (PTHR45973:SF2)
HUMAN|HGNC=2736|UniProtKB=Q96FC9	DDX11_HUMAN	ATP-dependent DNA helicase DDX11;DDX11;ortholog	ATP-DEPENDENT DNA HELICASE DDX11-RELATED (PTHR11472:SF41)	DNA helicase(PC00011)
HUMAN|HGNC=1553|UniProtKB=Q13185	CBX3_HUMAN	Chromobox protein homolog 3;CBX3;ortholog	CHROMOBOX PROTEIN HOMOLOG 3 (PTHR22812:SF134)
HUMAN|HGNC=9380|UniProtKB=P17612	KAPCA_HUMAN	cAMP-dependent protein kinase catalytic subunit alpha;PRKACA;ortholog	CAMP-DEPENDENT PROTEIN KINASE CATALYTIC SUBUNIT ALPHA (PTHR24353:SF82)
HUMAN|HGNC=12998|UniProtKB=O43670	ZN207_HUMAN	BUB3-interacting and GLEBS motif-containing protein ZNF207;ZNF207;ortholog	BUB3-INTERACTING AND GLEBS MOTIF-CONTAINING PROTEIN ZNF207 (PTHR23215:SF1)	DNA binding protein(PC00009)
HUMAN|HGNC=9388|UniProtKB=P10644	KAP0_HUMAN	cAMP-dependent protein kinase type I-alpha regulatory subunit;PRKAR1A;ortholog	CAMP-DEPENDENT PROTEIN KINASE TYPE I-ALPHA REGULATORY SUBUNIT (PTHR11635:SF129)
HUMAN|HGNC=9531|UniProtKB=P25787	PSA2_HUMAN	Proteasome subunit alpha type-2;PSMA2;ortholog	PROTEASOME SUBUNIT ALPHA TYPE-2 (PTHR11599:SF16)
HUMAN|HGNC=22931|UniProtKB=Q9P2N7	KLH13_HUMAN	Kelch-like protein 13;KLHL13;ortholog	KELCH-LIKE PROTEIN 13 (PTHR45632:SF7)
HUMAN|HGNC=9539|UniProtKB=P49721	PSB2_HUMAN	Proteasome subunit beta type-2;PSMB2;ortholog	PROTEASOME SUBUNIT BETA TYPE-2 (PTHR11599:SF6)
HUMAN|HGNC=14082|UniProtKB=Q9NQW6	ANLN_HUMAN	Anillin;ANLN;ortholog	ANILLIN (PTHR21538:SF23)

## Sheet: GO 0032446
HUMAN|HGNC=2552|UniProtKB=Q13617	CUL2_HUMAN	Cullin-2;CUL2;ortholog	CULLIN-2 (PTHR11932:SF131)	ubiquitin-protein ligase(PC00234)
HUMAN|HGNC=20157|UniProtKB=Q9ULT8	HECD1_HUMAN	E3 ubiquitin-protein ligase HECTD1;HECTD1;ortholog	E3 UBIQUITIN-PROTEIN LIGASE HECTD1 (PTHR45670:SF2)
HUMAN|HGNC=11427|UniProtKB=Q9UNE7	CHIP_HUMAN	E3 ubiquitin-protein ligase CHIP;STUB1;ortholog	E3 UBIQUITIN-PROTEIN LIGASE CHIP (PTHR46803:SF2)
HUMAN|HGNC=30911|UniProtKB=Q9Y4B6	DCAF1_HUMAN	DDB1- and CUL4-associated factor 1;DCAF1;ortholog	DDB1- AND CUL4-ASSOCIATED FACTOR 1 (PTHR13129:SF4)
HUMAN|HGNC=9563|UniProtKB=Q16401	PSMD5_HUMAN	26S proteasome non-ATPase regulatory subunit 5;PSMD5;ortholog	26S PROTEASOME NON-ATPASE REGULATORY SUBUNIT 5 (PTHR13554:SF10)
HUMAN|HGNC=9531|UniProtKB=P25787	PSA2_HUMAN	Proteasome subunit alpha type-2;PSMA2;ortholog	PROTEASOME SUBUNIT ALPHA TYPE-2 (PTHR11599:SF16)
HUMAN|HGNC=22931|UniProtKB=Q9P2N7	KLH13_HUMAN	Kelch-like protein 13;KLHL13;ortholog	KELCH-LIKE PROTEIN 13 (PTHR45632:SF7)
HUMAN|HGNC=9539|UniProtKB=P49721	PSB2_HUMAN	Proteasome subunit beta type-2;PSMB2;ortholog	PROTEASOME SUBUNIT BETA TYPE-2 (PTHR11599:SF6)
HUMAN|HGNC=8067|UniProtKB=Q99567	NUP88_HUMAN	Nuclear pore complex protein Nup88;NUP88;ortholog	NUCLEAR PORE COMPLEX PROTEIN NUP88 (PTHR13257:SF0)	transporter(PC00227)
HUMAN|HGNC=30313|UniProtKB=Q5T4S7	UBR4_HUMAN	E3 ubiquitin-protein ligase UBR4;UBR4;ortholog	E3 UBIQUITIN-PROTEIN LIGASE UBR4 (PTHR21725:SF1)
HUMAN|HGNC=12016|UniProtKB=P29144	TPP2_HUMAN	Tripeptidyl-peptidase 2;TPP2;ortholog	TRIPEPTIDYL-PEPTIDASE 2 (PTHR43806:SF14)	serine protease(PC00203)
HUMAN|HGNC=29929|UniProtKB=Q8NFH4	NUP37_HUMAN	Nucleoporin Nup37;NUP37;ortholog	NUCLEOPORIN NUP37 (PTHR22806:SF0)	transfer/carrier protein(PC00219)
HUMAN|HGNC=8734|UniProtKB=Q9BW27	NUP85_HUMAN	Nuclear pore complex protein Nup85;NUP85;ortholog	NUCLEAR PORE COMPLEX PROTEIN NUP85 (PTHR13373:SF21)	structural protein(PC00211)

## Sheet: GO 0009894
HUMAN|HGNC=4923|UniProtKB=P52789	HXK2_HUMAN	Hexokinase-2;HK2;ortholog	HEXOKINASE-2 (PTHR19443:SF4)
HUMAN|HGNC=17194|UniProtKB=Q9P0J0	NDUAD_HUMAN	NADH dehydrogenase [ubiquinone] 1 alpha subcomplex subunit 13;NDUFA13;ortholog	NADH DEHYDROGENASE [UBIQUINONE] 1 ALPHA SUBCOMPLEX SUBUNIT 13 (PTHR12966:SF0)	dehydrogenase(PC00092)
HUMAN|HGNC=6316|UniProtKB=Q92945	FUBP2_HUMAN	Far upstream element-binding protein 2;KHSRP;ortholog	FAR UPSTREAM ELEMENT-BINDING PROTEIN 2 (PTHR10288:SF101)	enzyme modulator(PC00095);mRNA splicing factor(PC00148);ribonucleoprotein(PC00201);serine protease(PC00203)
HUMAN|HGNC=11427|UniProtKB=Q9UNE7	CHIP_HUMAN	E3 ubiquitin-protein ligase CHIP;STUB1;ortholog	E3 UBIQUITIN-PROTEIN LIGASE CHIP (PTHR46803:SF2)
HUMAN|HGNC=6763|UniProtKB=Q13257	MD2L1_HUMAN	Mitotic spindle assembly checkpoint protein MAD2A;MAD2L1;ortholog	MITOTIC SPINDLE ASSEMBLY CHECKPOINT PROTEIN MAD2A (PTHR11842:SF13)
HUMAN|HGNC=9563|UniProtKB=Q16401	PSMD5_HUMAN	26S proteasome non-ATPase regulatory subunit 5;PSMD5;ortholog	26S PROTEASOME NON-ATPASE REGULATORY SUBUNIT 5 (PTHR13554:SF10)
HUMAN|HGNC=17035|UniProtKB=Q96B26	EXOS8_HUMAN	Exosome complex component RRP43;EXOSC8;ortholog	EXOSOME COMPLEX COMPONENT RRP43 (PTHR11097:SF9)	exoribonuclease(PC00099);hydrolase(PC00121)
HUMAN|HGNC=9380|UniProtKB=P17612	KAPCA_HUMAN	cAMP-dependent protein kinase catalytic subunit alpha;PRKACA;ortholog	CAMP-DEPENDENT PROTEIN KINASE CATALYTIC SUBUNIT ALPHA (PTHR24353:SF82)
HUMAN|HGNC=9531|UniProtKB=P25787	PSA2_HUMAN	Proteasome subunit alpha type-2;PSMA2;ortholog	PROTEASOME SUBUNIT ALPHA TYPE-2 (PTHR11599:SF16)
HUMAN|HGNC=5381|UniProtKB=P14735	IDE_HUMAN	Insulin-degrading enzyme;IDE;ortholog	INSULIN-DEGRADING ENZYME (PTHR43690:SF2)	metalloprotease(PC00153)
HUMAN|HGNC=9539|UniProtKB=P49721	PSB2_HUMAN	Proteasome subunit beta type-2;PSMB2;ortholog	PROTEASOME SUBUNIT BETA TYPE-2 (PTHR11599:SF6)
HUMAN|HGNC=20495|UniProtKB=Q9GZT3	SLIRP_HUMAN	SRA stem-loop-interacting RNA-binding protein, mitochondrial;SLIRP;ortholog	SRA STEM-LOOP-INTERACTING RNA-BINDING PROTEIN, MITOCHONDRIAL (PTHR15241:SF131)
HUMAN|HGNC=8067|UniProtKB=Q99567	NUP88_HUMAN	Nuclear pore complex protein Nup88;NUP88;ortholog	NUCLEAR PORE COMPLEX PROTEIN NUP88 (PTHR13257:SF0)	transporter(PC00227)
HUMAN|HGNC=29929|UniProtKB=Q8NFH4	NUP37_HUMAN	Nucleoporin Nup37;NUP37;ortholog	NUCLEOPORIN NUP37 (PTHR22806:SF0)	transfer/carrier protein(PC00219)
HUMAN|HGNC=16945|UniProtKB=Q9H074	PAIP1_HUMAN	Polyadenylate-binding protein-interacting protein 1;PAIP1;ortholog	POLYADENYLATE-BINDING PROTEIN-INTERACTING PROTEIN 1 (PTHR23254:SF15)	RNA binding protein(PC00031)
HUMAN|HGNC=8734|UniProtKB=Q9BW27	NUP85_HUMAN	Nuclear pore complex protein Nup85;NUP85;ortholog	NUCLEAR PORE COMPLEX PROTEIN NUP85 (PTHR13373:SF21)	structural protein(PC00211)

## Sheet: GO 0022402
Table S2. GO-terms analysis using the PANTHER Classification System tool. A statistical over-representation test with default settings was performed.
HUMAN|HGNC=10452|UniProtKB=P31350	RIR2_HUMAN	Ribonucleoside-diphosphate reductase subunit M2;RRM2;ortholog	RIBONUCLEOSIDE-DIPHOSPHATE REDUCTASE SUBUNIT M2 (PTHR23409:SF20)	reductase(PC00198)
HUMAN|HGNC=30073|UniProtKB=Q14181	DPOA2_HUMAN	DNA polymerase alpha subunit B;POLA2;ortholog	DNA POLYMERASE ALPHA SUBUNIT B (PTHR23061:SF12)	DNA-directed DNA polymerase(PC00018)
HUMAN|HGNC=24502|UniProtKB=O43379	WDR62_HUMAN	WD repeat-containing protein 62;WDR62;ortholog	WD REPEAT-CONTAINING PROTEIN 62 (PTHR45589:SF3)
HUMAN|HGNC=2552|UniProtKB=Q13617	CUL2_HUMAN	Cullin-2;CUL2;ortholog	CULLIN-2 (PTHR11932:SF131)	ubiquitin-protein ligase(PC00234)
HUMAN|HGNC=29130|UniProtKB=O94927	HAUS5_HUMAN	HAUS augmin-like complex subunit 5;HAUS5;ortholog	HAUS AUGMIN-LIKE COMPLEX SUBUNIT 5 (PTHR28588:SF1)
HUMAN|HGNC=6763|UniProtKB=Q13257	MD2L1_HUMAN	Mitotic spindle assembly checkpoint protein MAD2A;MAD2L1;ortholog	MITOTIC SPINDLE ASSEMBLY CHECKPOINT PROTEIN MAD2A (PTHR11842:SF13)
HUMAN|HGNC=9175|UniProtKB=P28340	DPOD1_HUMAN	DNA polymerase delta catalytic subunit;POLD1;ortholog	DNA POLYMERASE DELTA CATALYTIC SUBUNIT (PTHR10322:SF23)
HUMAN|HGNC=2736|UniProtKB=Q96FC9	DDX11_HUMAN	ATP-dependent DNA helicase DDX11;DDX11;ortholog	ATP-DEPENDENT DNA HELICASE DDX11-RELATED (PTHR11472:SF41)	DNA helicase(PC00011)
HUMAN|HGNC=9380|UniProtKB=P17612	KAPCA_HUMAN	cAMP-dependent protein kinase catalytic subunit alpha;PRKACA;ortholog	CAMP-DEPENDENT PROTEIN KINASE CATALYTIC SUBUNIT ALPHA (PTHR24353:SF82)
HUMAN|HGNC=12998|UniProtKB=O43670	ZN207_HUMAN	BUB3-interacting and GLEBS motif-containing protein ZNF207;ZNF207;ortholog	BUB3-INTERACTING AND GLEBS MOTIF-CONTAINING PROTEIN ZNF207 (PTHR23215:SF1)	DNA binding protein(PC00009)
HUMAN|HGNC=9388|UniProtKB=P10644	KAP0_HUMAN	cAMP-dependent protein kinase type I-alpha regulatory subunit;PRKAR1A;ortholog	CAMP-DEPENDENT PROTEIN KINASE TYPE I-ALPHA REGULATORY SUBUNIT (PTHR11635:SF129)
HUMAN|HGNC=14082|UniProtKB=Q9NQW6	ANLN_HUMAN	Anillin;ANLN;ortholog	ANILLIN (PTHR21538:SF23)
HUMAN|HGNC=1990|UniProtKB=Q8WWK9	CKAP2_HUMAN	Cytoskeleton-associated protein 2;CKAP2;ortholog	CYTOSKELETON-ASSOCIATED PROTEIN 2 (PTHR16076:SF8)
HUMAN|HGNC=9278|UniProtKB=O15355	PPM1G_HUMAN	Protein phosphatase 1G;PPM1G;ortholog	PROTEIN PHOSPHATASE 1G (PTHR13832:SF733)	kinase inhibitor(PC00139);protein phosphatase(PC00195)

## Sheet: GO 0065003
HUMAN|HGNC=10452|UniProtKB=P31350	RIR2_HUMAN	Ribonucleoside-diphosphate reductase subunit M2;RRM2;ortholog	RIBONUCLEOSIDE-DIPHOSPHATE REDUCTASE SUBUNIT M2 (PTHR23409:SF20)	reductase(PC00198)
HUMAN|HGNC=11830|UniProtKB=P04183	KITH_HUMAN	Thymidine kinase, cytosolic;TK1;ortholog	THYMIDINE KINASE, CYTOSOLIC (PTHR11441:SF0)	nucleotide kinase(PC00172)
HUMAN|HGNC=17194|UniProtKB=Q9P0J0	NDUAD_HUMAN	NADH dehydrogenase [ubiquinone] 1 alpha subcomplex subunit 13;NDUFA13;ortholog	NADH DEHYDROGENASE [UBIQUINONE] 1 ALPHA SUBCOMPLEX SUBUNIT 13 (PTHR12966:SF0)	dehydrogenase(PC00092)
HUMAN|HGNC=9563|UniProtKB=Q16401	PSMD5_HUMAN	26S proteasome non-ATPase regulatory subunit 5;PSMD5;ortholog	26S PROTEASOME NON-ATPASE REGULATORY SUBUNIT 5 (PTHR13554:SF10)
HUMAN|HGNC=7708|UniProtKB=O75306	NDUS2_HUMAN	NADH dehydrogenase [ubiquinone] iron-sulfur protein 2, mitochondrial;NDUFS2;ortholog	NADH DEHYDROGENASE [UBIQUINONE] IRON-SULFUR PROTEIN 2, MITOCHONDRIAL (PTHR11993:SF10)	dehydrogenase(PC00092);reductase(PC00198)
HUMAN|HGNC=10784|UniProtKB=Q99590	SCAFB_HUMAN	Protein SCAF11;SCAF11;ortholog	PROTEIN SCAF11 (PTHR47048:SF1)
HUMAN|HGNC=1462|UniProtKB=Q13557	KCC2D_HUMAN	Calcium/calmodulin-dependent protein kinase type II subunit delta;CAMK2D;ortholog	CALCIUM/CALMODULIN-DEPENDENT PROTEIN KINASE TYPE II SUBUNIT DELTA (PTHR24347:SF365)
HUMAN|HGNC=2080|UniProtKB=P54105	ICLN_HUMAN	Methylosome subunit pICln;CLNS1A;ortholog	METHYLOSOME SUBUNIT PICLN (PTHR21399:SF3)	transporter(PC00227)
HUMAN|HGNC=3720|UniProtKB=Q02790	FKBP4_HUMAN	Peptidyl-prolyl cis-trans isomerase FKBP4;FKBP4;ortholog	PEPTIDYL-PROLYL CIS-TRANS ISOMERASE FKBP4 (PTHR10516:SF25)	calcium-binding protein(PC00060);chaperone(PC00072);isomerase(PC00135)
HUMAN|HGNC=9380|UniProtKB=P17612	KAPCA_HUMAN	cAMP-dependent protein kinase catalytic subunit alpha;PRKACA;ortholog	CAMP-DEPENDENT PROTEIN KINASE CATALYTIC SUBUNIT ALPHA (PTHR24353:SF82)
HUMAN|HGNC=12998|UniProtKB=O43670	ZN207_HUMAN	BUB3-interacting and GLEBS motif-containing protein ZNF207;ZNF207;ortholog	BUB3-INTERACTING AND GLEBS MOTIF-CONTAINING PROTEIN ZNF207 (PTHR23215:SF1)	DNA binding protein(PC00009)
HUMAN|HGNC=10451|UniProtKB=P23921	RIR1_HUMAN	Ribonucleoside-diphosphate reductase large subunit;RRM1;ortholog	RIBONUCLEOSIDE-DIPHOSPHATE REDUCTASE LARGE SUBUNIT (PTHR11573:SF6)	reductase(PC00198)
HUMAN|HGNC=5381|UniProtKB=P14735	IDE_HUMAN	Insulin-degrading enzyme;IDE;ortholog	INSULIN-DEGRADING ENZYME (PTHR43690:SF2)	metalloprotease(PC00153)
HUMAN|HGNC=10943|UniProtKB=Q15758	AAAT_HUMAN	Neutral amino acid transporter B(0);SLC1A5;ortholog	NEUTRAL AMINO ACID TRANSPORTER B(0) (PTHR11958:SF19)	cation transporter(PC00068)
HUMAN|HGNC=15925|UniProtKB=Q9Y3Z3	SAMH1_HUMAN	Deoxynucleoside triphosphate triphosphohydrolase SAMHD1;SAMHD1;ortholog	DEOXYNUCLEOSIDE TRIPHOSPHATE TRIPHOSPHOHYDROLASE SAMHD1 (PTHR11373:SF4)
HUMAN|HGNC=29195|UniProtKB=Q9UPN7	PP6R1_HUMAN	Serine/threonine-protein phosphatase 6 regulatory subunit 1;PPP6R1;ortholog	SERINE/THREONINE-PROTEIN PHOSPHATASE 6 REGULATORY SUBUNIT 1 (PTHR12634:SF13)	phosphatase modulator(PC00184)
HUMAN|HGNC=14082|UniProtKB=Q9NQW6	ANLN_HUMAN	Anillin;ANLN;ortholog	ANILLIN (PTHR21538:SF23)
HUMAN|HGNC=11162|UniProtKB=P62306	RUXF_HUMAN	Small nuclear ribonucleoprotein F;SNRPF;ortholog	SMALL NUCLEAR RIBONUCLEOPROTEIN F (PTHR11021:SF6)	mRNA splicing factor(PC00148)
HUMAN|HGNC=17052|UniProtKB=O94979	SC31A_HUMAN	Protein transport protein Sec31A;SEC31A;ortholog	PROTEIN TRANSPORT PROTEIN SEC31A (PTHR13923:SF23)	vesicle coat protein(PC00235)
HUMAN|HGNC=29024|UniProtKB=O15084	ANR28_HUMAN	Serine/threonine-protein phosphatase 6 regulatory ankyrin repeat subunit A;ANKRD28;ortholog	SERINE/THREONINE-PROTEIN PHOSPHATASE 6 REGULATORY ANKYRIN REPEAT SUBUNIT A (PTHR24123:SF75)
HUMAN|HGNC=12732|UniProtKB=Q92558	WASF1_HUMAN	Wiskott-Aldrich syndrome protein family member 1;WASF1;ortholog	WISKOTT-ALDRICH SYNDROME PROTEIN FAMILY MEMBER 1 (PTHR12902:SF8)	non-motor actin binding protein(PC00165)
HUMAN|HGNC=1173|UniProtKB=Q5H9R7	PP6R3_HUMAN	Serine/threonine-protein phosphatase 6 regulatory subunit 3;PPP6R3;ortholog	SERINE/THREONINE-PROTEIN PHOSPHATASE 6 REGULATORY SUBUNIT 3 (PTHR12634:SF12)	phosphatase modulator(PC00184)

[truncated: 1 more sheets: GO 0006996]
